# Supplementary material for: Trends in Encounters for Emergency Contraception in US Emergency Departments, 2006-2020
Source: PubMed Central journal article supplement (PMC10818211; doi:10.1001/jamanetworkopen.2023.53672), 2024-01-26
Supplement: jamanetwopen-e2353672-s002.pdf [file jamanetwopen-e2353672-s002.pdf]

## Data Sharing Statement

Vogt. Trends in Encounters for Emergency Contraception in US Emergency Departments, 2006-2020. *JAMA Netw Open*. Published January 26, 2024.  
doi:10.1001/jamanetworkopen.2023.53672

### Data

**Data available:** No

### Additional Information

**Explanation for why data not available:** These data are available to the public from HCUP for purchase but under their contract, we cannot share their data.
